## RESEARCH ARTICLE

# The complete mitochondrial genome of *Calyptogena marissinica* (Heterodonta: Veneroida: Vesicomymidae): Insight into the deep-sea adaptive evolution of vesicomymids

Mei Yang<sup>1,2,3,4</sup>, Lin Gong<sup>1,2,3,4</sup>, Jixing Sui<sup>1,2,3,4</sup>, Xinzheng Li<sup>1,2,3,4\*</sup>

**1** Department of Marine Organism Taxonomy and Phylogeny, Institute of Oceanology, Chinese Academy of Sciences, Qingdao, China, **2** Center for Ocean Mega-Science, Chinese Academy of Sciences, Qingdao, China, **3** Laboratory for Marine Biology and Biotechnology, Qingdao National Laboratory for Marine Science and Technology, Qingdao, China, **4** University of Chinese Academy of Sciences, Beijing, China

\* [lixzh@qdio.ac.cn](mailto:lixzh@qdio.ac.cn)

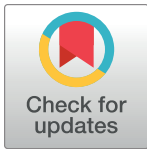

## OPEN ACCESS

**Citation:** Yang M, Gong L, Sui J, Li X (2019) The complete mitochondrial genome of *Calyptogena marissinica* (Heterodonta: Veneroida: Vesicomymidae): Insight into the deep-sea adaptive evolution of vesicomymids. PLoS ONE 14(9): e0217952. <https://doi.org/10.1371/journal.pone.0217952>

**Editor:** Marc Robinson-Rechavi, Universite de Lausanne Faculte de biologie et medecine, SWITZERLAND

**Received:** May 21, 2019

**Accepted:** August 23, 2019

**Published:** September 19, 2019

**Copyright:** © 2019 Yang et al. This is an open access article distributed under the terms of the [Creative Commons Attribution License](https://creativecommons.org/licenses/by/4.0/), which permits unrestricted use, distribution, and reproduction in any medium, provided the original author and source are credited.

**Data Availability Statement:** All complete sequences of *Calyptogena marissinica* mitochondrial genome files are available from the GenBank database (accession number: MK948426).

**Funding:** This research was funded by the National Key R&D Program of China, 2018YFC0309804 to LG, the National Natural Science Foundation of China, 41506173 to MY, and Strategic Priority

## Abstract

The deep-sea chemosynthetic environment is one of the most extreme environments on the Earth, with low oxygen, high hydrostatic pressure and high levels of toxic substances. Species of the family Vesicomymidae are among the dominant chemosymbiotic bivalves found in this harsh habitat. Mitochondria play a vital role in oxygen usage and energy metabolism; thus, they may be under selection during the adaptive evolution of deep-sea vesicomymids. In this study, the mitochondrial genome (mitogenome) of the vesicomymid bivalve *Calyptogena marissinica* was sequenced with Illumina sequencing. The mitogenome of *C. marissinica* is 17,374 bp in length and contains 13 protein-coding genes, 2 ribosomal RNA genes (*rns* and *rnl*) and 22 transfer RNA genes. All of these genes are encoded on the heavy strand. Some special elements, such as tandem repeat sequences, “G(A)<sub>n</sub>T” motifs and AT-rich sequences, were observed in the control region of the *C. marissinica* mitogenome, which is involved in the regulation of replication and transcription of the mitogenome and may be helpful in adjusting the mitochondrial energy metabolism of organisms to adapt to the deep-sea chemosynthetic environment. The gene arrangement of protein-coding genes was identical to that of other sequenced vesicomymids. Phylogenetic analyses clustered *C. marissinica* with previously reported vesicomymid bivalves with high support values. Positive selection analysis revealed evidence of adaptive change in the mitogenome of Vesicomymidae. Ten potentially important adaptive residues were identified, which were located in *cox1*, *cox3*, *cob*, *nad2*, *nad4* and *nad5*. Overall, this study sheds light on the mitogenomic adaptation of vesicomymid bivalves that inhabit the deep-sea chemosynthetic environment.

## Introduction

Mitochondria, which descended from Proteobacteria via endosymbiosis, are important organelles in eukaryotic cells and are involved in various processes, such as ATP generation,

Research Program of the Chinese Academy of Sciences, XDB06010101 to XL. The funders had no role in study design, data collection and analysis, decision to publish, or preparation of the manuscript.

**Competing interests:** The authors have declared that no competing interests exist.

signaling, cell differentiation, growth and apoptosis [1]. Moreover, mitochondria have their own genetic information system. In general, the metazoan mitogenome is a closed, circular DNA molecule, ranging from 12 to 20 kb in length and usually containing 37 genes: 13 protein-coding genes (PCGs) (*atp6*, *atp8*, *cox1-3*, *cob*, *nad1-6* and *nad4l*) of the respiratory chain, 2 ribosomal RNA (rRNA) genes (*rrnS* and *rrnL*) and 22 transfer RNA (tRNA) genes [2]. In addition, there are several noncoding regions in the mitogenome, and the longest noncoding “AT-rich” region is normally interpreted as the control region (CR), which includes elements controlling the initiation and regulation of transcription and replication [3]. Owing to variable gene order, a low frequency of gene recombination and different genes having different evolutionary rates, mitochondrial sequences are widely used for species identification, genetic diversity assessment and phylogenetics at various taxonomic levels [4–7].

Since the discovery of cold seeps and hydrothermal vents in the deep-sea, the unique biological communities that depend on chemosynthetic primary production have attracted the attention of researchers [8–11]. These deep-sea chemosynthetic environments lack sunlight and exhibit high pressure, low oxygen and high levels of chemical toxicity due to various heavy metals, and the organisms that live there show a series of adaptations (more complex innate immune system, expanded gene families for stabilizing protein structures and removing toxic substances, a set of positively selected genes related to cytoskeleton structures, DNA repair and genetic information processing) compared with marine species in coastal environments [12–15]. Mitochondria are the energy metabolism centers of eukaryotic cells, which can generate more than 95% of cellular energy through oxidative phosphorylation (OXPHOS) [3]. Therefore, mitochondrial PCGs may undergo evolutionary selection in response to metabolic requirements in extremely harsh environments [16–18]. Numerous studies have found clear and compelling evidence of adaptive evolution in the mitogenome of organisms from extreme habitats, including Tibetan humans [19], Chinese snub-nosed monkeys [20], Tibetan horses [21–22], Tibetan wild yaks [23], galliform birds [24], and Tibetan loaches [25].

The family Vesicomidae (Dall & Simpson, 1901) is widely distributed worldwide from shelf to hadal depths and comprises specialized bivalves occurring in reducing environments such as hydrothermal vents located in mid-ocean ridges and back-arc basins, cold seeps at continental margins and whale falls [26–29]. Studies have shown that vesicomid bivalves rely upon the symbiotic chemoautotrophic bacteria in their gills for all or part of nutrition [30–31]. Based on the shells and soft body, the Vesicomidae is divided into two subfamilies: Vesicominae and Pliocardiinae. The Vesicominae includes only one genus, *Vesicomia*, while Pliocardiinae currently contains 20 genera. Among the 20 genera, *Calyptogena* is the most diverse group of deep-sea vesicomid bivalves in the western Pacific region and its marginal seas [32]. As some of the dominant species in the deep-sea, vesicomids are an interesting taxon with which to study the mechanisms of adaptation to diverse stressors in deep-sea habitats. Considering that the mitogenome has highly compact DNA and is easily accessible, several complete/nearly complete mitogenomes of vesicomids have been sequenced [33–36] in recent years; however, limited information is available about the mechanism of adaptation to deep-sea habitats in vesicomids at the mitogenome level.

In the present study, we obtained the mitogenome of *Calyptogena marissinica*, a new species of the family Vesicomidae from the Haima cold seep of the South China Sea. First, the mitogenome organization, codon usage, and gene order information were obtained, and we compared the composition of this mitogenome with that of other available vesicomid bivalve mitogenomes. Second, based on mitochondrial PCGs and 2 rRNA genes, the phylogenetic relationships between *C. marissinica* and other species from subclass Heterodonta were examined. Finally, to understand the adaptive evolution of deep-sea organisms, we conducted positive selection analysis of vesicomid bivalve mitochondrial PCGs.

## Materials and methods

### Sampling, identification and DNA extraction

Specimen of *C. marissinica* was sampled from the “Haima” methane seep in the northern sector of the South China Sea, 16°43.80′N, 110°28.50′E, 1,390 m, using a remotely operated vehicle (ROV) in May 2018. Species-level morphological identification was performed according to the main points of Chen et al. (2018) [32]. Specimen was dissected and different tissues were preserved separately at -80°C until DNA extraction. Total genomic DNA was extracted from the adductor muscle tissue using a DNeasy tissue kit (Qiagen, Beijing, China) following the manufacturer’s protocols.

### Illumina sequencing, mitogenome assembly and annotation

After DNA isolation, 1 µg of purified DNA was fragmented, used to construct short-insert libraries (insert size of 430 bp) according to the manufacturer’s instructions (TruSeq™ Nano DNA Sample Prep Kit, Illumina), and then sequenced on an Illumina HiSeq 4000 instrument (San Diego, USA).

Prior to assembly, raw reads were filtered by Trimmomatic 0.35. This filtering step was performed to remove the reads with adaptors, the reads showing a quality score below 20 ( $Q < 20$ ), the reads containing a percentage of uncalled bases (“N” characters) equal to or greater than 10% and the duplicated sequences. The mitochondrial genome was reconstructed using a combination of *de novo* and reference-guided assemblies, and the following three steps were used to assemble the mitogenome. First, the filtered reads were assembled into contigs using SPAdes 3.10.1. Second, contigs were aligned to the reference mitogenomes from species of the family Vesicomyidae using BLAST (<https://blast.ncbi.nlm.nih.gov/Blast.cgi>), and aligned contigs ( $\geq 80\%$  similarity and query coverage) were ordered according to the reference mitogenomes. Third, clean reads were mapped to the assembled draft mitogenome using GapCloser 1.12 with default parameters, and the majority of gaps were filled via local assembly.

The mitochondrial genes were annotated using homology alignments and *de novo* prediction, and EVIDENCEModeler [37] was used to integrate the gene set. rRNA genes and tRNA genes were predicted by rRNAMmer [38] and tRNAscan-SE [39]. A whole-mitochondrial genome BLAST search ( $E\text{-value} \leq 1e^{-5}$ , minimal alignment length percentage  $\geq 40\%$ ) was performed against 5 databases, namely, the KEGG (Kyoto Encyclopedia of Genes and Genomes), COG (Clusters of Orthologous Groups), NR (Non-Redundant Protein), Swiss-Prot and GO (Gene Ontology) databases. Organellar Genome DRAW [40] was used for circular display of the *C. marissinica* mitogenome.

### Sequence analysis

The nucleotide composition and codon usage were computed using DnaSP 5.1 [41]. The AT and GC skews were calculated with the following formulas:  $AT\ skew = (A - T) / (A + T)$  and  $GC\ skew = (G - C) / (G + C)$  [42], where A, T, G and C are the occurrences of the four nucleotides. Tandem Repeats Finder 4.0 [43] was used to search for the tandem repeat sequences. The online version of Mfold [44] was applied to infer potential secondary structure, and if more than one secondary structure appeared, the one with the lowest free energy score was used.

### Phylogenetic analysis

The phylogeny of the subclass Heterodonta was reconstructed using mitogenome data from 41 species, including 2 Lucinida species, 2 Myoida species, and 37 Veneroida species, and

*Chlamys farreri* and *Mimachlamys nobilis* from the subclass Pteriomorphia served as out-groups (S1 Table). Our data set was based on nucleotide and amino acid sequences from 9 mitochondrial PCGs (*cox1*, *cox2*, *cox3*, *cob*, *atp6*, *nad1*, *nad4*, *nad5*, and *nad6*) and 2 rRNA genes. The *atp8*, *nad2*, *nad4l* and *nad6* sequences were excluded due to several species with incomplete mitogenomes. Multiple alignments of the whole 11 genes were conducted using MUSCLE 3.8.31. In aligned sequences, ambiguously aligned regions and gaps were removed using Gblocks server 0.91b [45] with the default setting. ModelTest 2.1.10 [46] and ProtTest 3.4 [47] were used to select the best-fit evolutionary models GTR + I + G and LG + I + G + F for the nucleotide dataset and amino acid dataset, respectively. Maximum likelihood (ML) analysis was performed using RAxML 8.2.8 [48]. Topological robustness for the ML analysis was evaluated with 100 replicates of bootstrap support. Bayesian inference (BI) was conducted using MrBayes 3.2.6 [49], and four Markov chain Monte Carlo (MCMC) chains were run for  $10^6$  generations, with sampling every 100 generations and a 25% relative burn-in. All phylogenetic trees were graphically edited with the iTOL 3.4.3 (<https://itol.embl.de/itol.cgi>).

### Positive selection analysis

Comparing the nonsynonymous/synonymous substitution ratios ( $\omega = dN/dS$ ) has become a useful approach for quantifying the impact of natural selection on molecular evolution [50].  $\omega > 1$ ,  $\omega = 1$  and  $\omega < 1$  indicate positive selection, neutrality and purifying selection, respectively [51]. The codon-based maximum likelihood (CodeML) method implemented in the PAML package [52] was applied to estimate the  $dN/dS$  ratio  $\omega$ . The combined database of 13 mitochondrial PCGs was used for the selection pressure analyses (S2 Table). Both the ML and Bayesian phylogenetic trees were separately used as the working topology in all CodeML analyses.

To evaluate positive selection in the vesicomyid bivalves, we used branch models in the present study. First, the one-ratio model ( $M_0$ ) estimate the distribution of  $\omega$  values as a benchmark under an assumption of no adaptive evolution in the gene sequences, which assumes a single  $\omega$  ratio for all branches in the phylogeny [53]. Then, the two-ratio model ( $M_2$ ), which allows the background lineages and foreground lineages to have different  $\omega$  ratio values, was used to detect positive selection acting on branches of interest [54–55]. Last, a free-ratio model ( $M_1$ ), which allows  $\omega$  ratio variation among branches, was used to estimate  $\omega$  values on each branch [55]. Here, the one-ratio model ( $M_0$ ) and the free-ratio model ( $M_1$ ) were compared to confirm whether different clades in Heterodonta had different  $\omega$  values. Additionally, we compared the one-ratio model ( $M_0$ ) and the two-ratio model ( $M_2$ ) to investigate whether deep-sea vesicomyid clades are subjected to more selection pressure than other Heterodonta species in coastal waters.  $\omega_0$  and  $\omega_1$  represent the values for the other Heterodonta clades in the phylogeny and the vesicomyid clades, respectively. Pairwise models were compared with critical values of the Chi square ( $\chi^2$ ) distribution using likelihood ratio tests (LRTs), in which the test statistic was estimated as twice the difference in log likelihood ( $2\Delta L$ ) and the degrees of freedom were estimated as the difference in the number of parameters for each model.

Furthermore, we fit branch-site models to examine positive selection on some sites among the vesicomyid clades. Branch-site models allow  $\omega$  to vary both among sites in the protein and across branches on the tree. Branch-site model A (positive selection model) was used to identify the positively selected sites among the lineages of vesicomyids (marked as foreground lineages). The presence of sites with  $\omega > 1$  suggests that model A fits the data significantly better than the corresponding null model. Bayes Empirical Bayes analysis was used to calculate posterior probabilities in order to identify sites under positive selection on the foreground lineages if the LRTs was significant [56].

## Results and discussion

### *C. marissinica* mitogenome organization

The Illumina HiSeq runs resulted in 20,359,890 paired-end reads from the *C. marissinica* library with an insert size of approximately 450 bp. Selective-assembly analysis showed that 312,068 reads were assembled into a 17,374 bp circular molecule, which represented the complete mitogenome of *C. marissinica* (Fig 1 and Table 1). This length is shorter than that of the complete mitogenome of other vesicomyid bivalves, which ranges from 19,738 bp in *Calyptogena magnifica* [33] to 19,424 bp in *Abyssogena phaseoliformis* [35]. The genome encodes 37 genes, including 13 PCGs, 2 rRNA genes, and 22 tRNA genes (duplication of *tRNA<sup>Leu</sup>* and *tRNA<sup>Ser</sup>*). All of the genes are encoded on the heavy (H) strand, as consistently reported for other bivalves [35–36,56], and transcribed in the same direction. A total of 2,287 bp of noncoding nucleotides are scattered among 23 intergenic regions varying from 1 to 1,676 bp in length (Table 1). The largest noncoding region (1,676 bp) is located between *tRNA<sup>Trp</sup>* and *nad6* and is identified as the putative control region (CR) due to its location and high A+T content (73.3%). Furthermore, there are four overlaps between adjacent genes in the *C. marissinica* mitogenome with a size range of 1 to 5 bp (*tRNA<sup>Glu</sup>* / *tRNA<sup>Ser(UCA)</sup>*, *tRNA<sup>Leu(UUA)</sup>* / *nad1*, *rrnS* / *tRNA<sup>Met</sup>*, and *cox3* / *tRNA<sup>Phe</sup>*).

The *C. marissinica* mitogenome has a nucleotide composition of 25.9% A, 10.8% C, 23.8% G, and 39.5% T and an overall AT content of 65.4%. The AT skew and GC skew are well conserved among vesicomyids, which vary from -0.165 to -0.230 and 0.343 to 0.440, respectively (Table 2). For the *C. marissinica* mitogenome, the AT skew is -0.209, and the GC skew is 0.375, which indicates bias toward T and G similar to that in other vesicomyids. The complete mitochondrial DNA sequence has been deposited in GenBank under accession number MK948426.

### Protein-coding genes

The total length of all 13 PCGs of *C. marissinica* is 11,775 bp, accounting for 67.8% of the complete length of the mitogenome, and the PCGs encode 3,912 amino acids (Table 2). In the mitogenome of metazoans, most PCGs start with the standard ATN codon [2,57–58]. In the present study, with the exception of the *atp8* gene, which had the alternate initiation codon GTG, all the PCGs were initiated by typical ATN codons: 6 genes (*atp6*, *cob*, *cox1*, *cox2*, *cox3*, and *nad4*) were initiated by ATG, 4 genes (*nad2*, *nad3*, *nad4l*, and *nad6*) were initiated by ATT, and 2 genes (*nad1* and *nad5*) were initiated by ATA. Notably, genes are commonly initiated by GTG in vesicomyid bivalves [34], and the amino acid encoded by GTG is valine, which belongs to the nonpolar amino acids, such as methionine and isoleucine encoded by ATN. Moreover, in eight other vesicomyid bivalves (*Archivesica* sp., *Archivesica gigas*, *Archivesica pacifica*, *C. magnifica*, *Abyssogena mariana*, *Ab. phaseoliformis*, *Isorropodon fossajaponicum*, and *Phreagena okutanii*), *cox3* had a truncated termination codon, TA [34]. Previous studies have shown that the truncated stop codon is common in the metazoan mitogenome and might be corrected by posttranscriptional polyadenylation [59–60]. However, in the mitogenome of *C. marissinica*, all of the PCGs were ended by a complete TAA (*atp6*, *cob*, *cox1*, *cox2*, *nad3*, *nad4*, *nad4l*, *nad5*, and *nad6*) or TAG (*atp8*, *cox3*, *nad1*, and *nad2*) termination codon.

Numerous studies have indicated that metazoan mitogenomes usually have a bias toward a higher representation of nucleotides A and T, leading to a subsequent bias in the corresponding encoded amino acids [58,61–63]. In the mitogenome of *C. marissinica*, the A+T contents of PCGs and third codon positions are 63.2% and 69.7%, respectively, which are similar to the values observed in other vesicomyids (Table 2). The amino acid usage and relative

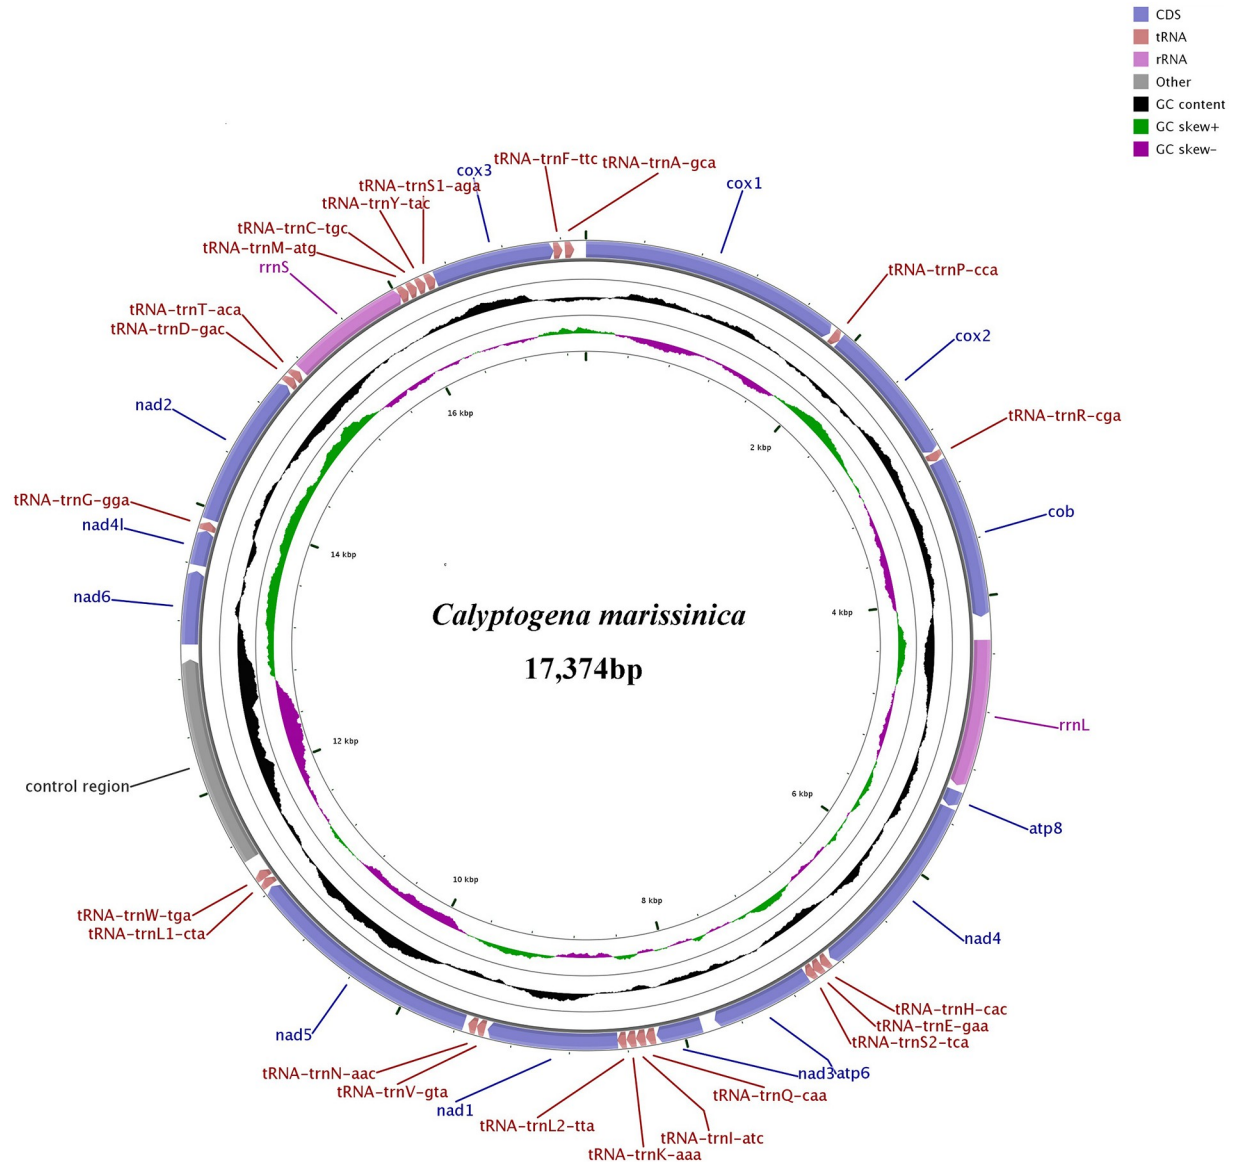

**Fig 1. Complete mitogenome map of *C. marissinica*.** All 37 genes are encoded on the heavy (H) strand. Genes for proteins and rRNAs are shown with standard abbreviations. Genes for tRNAs are displayed by a single letter for the corresponding amino acid, with two leucine tRNAs and two serine tRNAs differentiated by numerals.

<https://doi.org/10.1371/journal.pone.0217952.g001>

synonymous codon usage (RSCU) values in the PCGs of *C. marissinica* are summarized in Fig 2. The mitogenome encodes a total of 3,912 amino acids, among which leucine (13.6%) and glutamine (1.4%) are the most and the least frequently used, respectively. As mentioned earlier, the amino acids encoded by A+T-rich codon families (Asn, Ile, Lys, Met, Phe and Tyr) have a higher frequency of use than those encoded by G+C-rich codon families (Ala, Arg, Gly and Pro). The RSCU values indicate that the six most commonly used codons are TTA (Leu), ACT (Thr), GGG (Gly), TCT (Ser), GCT (Ala), and CCT (Pro) (Fig 2), which show A+T bias at their third codon position. In addition, the codons with A and T in the third position are used more frequently than other synonymous codons. These features reflect codon usage with A

Table 1. Mitogenome organization of *C. marissinica*.

| Name                          | Strand | Range       | Size        |             | Codon |      |           | Intergenic nucleotides |
|-------------------------------|--------|-------------|-------------|-------------|-------|------|-----------|------------------------|
|                               |        |             | Nucleotides | Amino acids | Start | Stop | Anticodon |                        |
| <i>cox1</i>                   | +      | 1–1833      | 1833        | 610         | ATG   | TAA  |           | -                      |
| <i>tRNA-Pro</i>               | +      | 1854–1917   | 64          |             |       |      | TGG       | 20                     |
| <i>cox2</i>                   | +      | 1918–2934   | 1017        | 338         | ATG   | TAA  |           | 0                      |
| <i>tRNA-Arg</i>               | +      | 2941–3005   | 65          |             |       |      | TCG       | 6                      |
| <i>cob</i>                    | +      | 3010–4143   | 1134        | 377         | ATG   | TAA  |           | 4                      |
| <i>rrnL</i>                   | +      | 4305–5340   | 1036        |             |       |      |           | 161                    |
| <i>atp8</i>                   | +      | 5377–5493   | 117         | 38          | —     | TAG  |           | 36                     |
| <i>nad4</i>                   | +      | 5506–6852   | 1347        | 448         | ATG   | TAA  |           | 12                     |
| <i>tRNA-His</i>               | +      | 6873–6933   | 61          |             |       |      | GTG       | 20                     |
| <i>tRNA-Glu</i>               | +      | 6934–6999   | 66          |             |       |      | TTC       | 0                      |
| <i>tRNA-Ser<sup>UCA</sup></i> | +      | 6996–7059   | 64          |             |       |      | TGA       | -4                     |
| <i>atp6</i>                   | +      | 7060–7773   | 714         | 237         | ATG   | TAA  |           | 0                      |
| <i>nad3</i>                   | +      | 7872–8192   | 321         | 106         | ATT   | TAA  |           | 98                     |
| <i>tRNA-Gln</i>               | +      | 8203–8269   | 67          |             |       |      | TTG       | 10                     |
| <i>tRNA-Ile</i>               | +      | 8272–8338   | 67          |             |       |      | GAT       | 2                      |
| <i>tRNA-Lys</i>               | +      | 8339–8405   | 67          |             |       |      | TTT       | 0                      |
| <i>tRNA-Leu<sup>UUA</sup></i> | +      | 8407–8469   | 63          |             |       |      | TAA       | 1                      |
| <i>nad1</i>                   | +      | 8467–9381   | 915         | 304         | ATA   | TAG  |           | -3                     |
| <i>tRNA-Val</i>               | +      | 9399–9460   | 62          |             |       |      | TAC       | 17                     |
| <i>tRNA-Asn</i>               | +      | 9461–9522   | 62          |             |       |      | GTT       | 0                      |
| <i>nad5</i>                   | +      | 9550–11223  | 1674        | 557         | ATA   | TAA  |           | 27                     |
| <i>tRNA-Leu<sup>CUA</sup></i> | +      | 11236–11297 | 62          |             |       |      | TAG       | 12                     |
| <i>tRNA-Trp</i>               | +      | 11298–11362 | 65          |             |       |      | TCA       | 0                      |
| <i>control region</i>         | +      | 11363–13038 | 1676        |             |       |      |           | 0                      |
| <i>nad6</i>                   | +      | 13039–13554 | 516         | 171         | ATT   | TAA  |           | 0                      |
| <i>nad4l</i>                  | +      | 13595–13843 | 249         | 82          | ATT   | TAA  |           | 40                     |
| <i>tRNA-Gly</i>               | +      | 13844–13907 | 64          |             |       |      | TCC       | 0                      |
| <i>nad2</i>                   | +      | 13925–15010 | 1086        | 361         | ATT   | TAG  |           | 17                     |
| <i>tRNA-Asp</i>               | +      | 15020–15081 | 62          |             |       |      | GTC       | 9                      |
| <i>tRNA-Thr</i>               | +      | 15082–15142 | 61          |             |       |      | TGT       | 0                      |
| <i>rrnS</i>                   | +      | 15160–16027 | 868         |             |       |      |           | 17                     |
| <i>tRNA-Met</i>               | +      | 16023–16089 | 67          |             |       |      | CAT       | -5                     |
| <i>tRNA-Cys</i>               | +      | 16092–16153 | 62          |             |       |      | GCA       | 2                      |
| <i>tRNA-Tyr</i>               | +      | 16159–16220 | 62          |             |       |      | GTA       | 5                      |
| <i>tRNA-Ser<sup>AGA</sup></i> | +      | 16228–16296 | 69          |             |       |      | TCT       | 7                      |
| <i>cox3</i>                   | +      | 16297–17148 | 852         | 283         | ATG   | TAG  |           | 0                      |
| <i>tRNA-Phe</i>               | +      | 17148–17210 | 63          |             |       |      | GAA       | -1                     |
| <i>tRNA-Ala</i>               | +      | 17228–17293 | 66          |             |       |      | TGC       | 17                     |

<https://doi.org/10.1371/journal.pone.0217952.t001>

and T biases at the third codon position, which are similar to the biases that exist in many metazoans [16,64–66].

### Ribosomal RNA and transfer RNA genes

The *rrnL* and *rrnS* genes of *C. marissinica* are 1,036 bp (AT% = 67.2) and 868 bp (AT% = 67.7) in length, respectively. As in other vesicomyid bivalves, *rrnL* is located between the *cob* and

Table 2. Mitogenomes of Vesicomidae species sequenced to date and their genomic features.

| Species                                        | Genus              | Accession number | Length (bp) | Genome |         |         | Protein-coding genes |              |           | <i>rrnL</i> |      | <i>rrnS</i> |      | tRNAs              |      | Control region |      |
|------------------------------------------------|--------------------|------------------|-------------|--------|---------|---------|----------------------|--------------|-----------|-------------|------|-------------|------|--------------------|------|----------------|------|
|                                                |                    |                  |             | AT %   | AT skew | GC skew | Length (aa)          | AT % (all)   | AT% (3rd) | Length (bp) | AT % | Length (bp) | AT % | Number/Length (bp) | AT % | Length (bp)    | AT % |
| <i>Abyssogena mariana</i> <sup>1</sup>         | <i>Abyssogena</i>  | LC126311         | 15,927*     | 69.8   | -0.210  | 0.408   | 3884                 | 69.0         | 73.9      | 1196        | 71.2 | 862         | 70.8 | 23/1279            | 71.7 | -              | -    |
| <i>Abyssogena phaseoliformis</i>               | <i>Abyssogena</i>  | AP014557         | 19,424      | 70.4   | -0.199  | 0.440   | 3881                 | 68.3         | 73.7      | 1196        | 71.2 | 862         | 70.9 | 24/1282            | 70.4 | 3,438          | 74.4 |
| <i>Akebiconcha kawamura</i> <sup>2</sup>       | <i>Akebiconcha</i> | AP014551         | 12,946*     | 65.2   | -0.222  | 0.371   | 3249                 | 62.5         | 68.7      | 1194        | 69.7 | 205         | 67.7 | 17/1090            | 69.0 | -              | -    |
| <i>Archivesica gigas</i> <sup>1</sup>          | <i>Archivesica</i> | MF959623         | 15,674*     | 65.0   | -0.228  | 0.389   | 3878                 | 63.6         | 70.6      | 1223        | 68.9 | 879         | 67.9 | 21/1212            | 68.7 | -              | -    |
| <i>Archivesica pacifica</i> <sup>1</sup>       | <i>Archivesica</i> | MF959624         | 17,782*     | 68.6   | -0.214  | 0.429   | 4002                 | 67.1         | 79.5      | 1226        | 71.3 | 885         | 69.9 | 22/1282            | 69.6 | -              | -    |
| <i>Archivesica</i> sp. <sup>1</sup>            | <i>Archivesica</i> | MF959622         | 15,650*     | 64.8   | -0.228  | 0.386   | 3889                 | 63.7         | 70.8      | 1221        | 69.0 | 879         | 67.8 | 20/1214            | 68.7 | -              | -    |
| <i>Calyptogena fausta</i> <sup>2</sup>         | <i>Calyptogena</i> | AP014549         | 13,509*     | 66.0   | -0.218  | 0.394   | 3410                 | 0.64<br>64.7 | 70.7      | 1189        | 70.3 | 205         | 67.8 | 17/1092            | 70.0 | -              | -    |
| <i>Calyptogena laubirei</i> <sup>2</sup>       | <i>Calyptogena</i> | AP014553         | 12,968*     | 64.3   | -0.226  | 0.361   | 3259                 | 61.6         | 67.1      | 1191        | 69.0 | 204         | 67.2 | 17/1090            | 67.8 | -              | -    |
| <i>Calyptogena magnifica</i>                   | <i>Calyptogena</i> | NC_028724        | 19,738      | 68.4   | -0.195  | 0.390   | 3928                 | 65.5         | 75.6      | 1219        | 70.5 | 935         | 70.0 | 22/1347            | 70.2 | 3,910          | 75.2 |
| <i>Calyptogena marissinica</i>                 | <i>Calyptogena</i> | MK948426         | 17,374      | 65.4   | -0.209  | 0.375   | 3912                 | 63.2         | 69.7      | 1,036       | 67.2 | 868         | 67.7 | 22/1,411           | 68.7 | 1,676          | 73.3 |
| <i>Calyptogena nautilei</i> <sup>2</sup>       | <i>Calyptogena</i> | AP014554         | 13,281*     | 69.4   | -0.196  | 0.353   | 3298                 | 68.0         | 74.4      | 1182        | 72.1 | 204         | 72.1 | 17/1088            | 71.4 | -              | -    |
| <i>Calyptogena pacifica</i> <sup>2</sup>       | <i>Calyptogena</i> | AP014556         | 13,454*     | 67.6   | -0.222  | 0.420   | 3390                 | 66.6         | 72.6      | 1195        | 70.8 | 204         | 69.6 | 17/1088            | 69.5 | -              | -    |
| <i>Isorropodon fossajaponicum</i> <sup>1</sup> | <i>Isorropodon</i> | AP014550         | 19,556*     | 68.2   | -0.165  | 0.343   | 3894                 | 66.6         | 70.6      | 1199        | 70.3 | 861         | 68.3 | 24/1290            | 70.3 | -              | -    |
| <i>Phreagena kilmeri</i> <sup>2</sup>          | <i>Phreagena</i>   | AP014552         | 12,944*     | 64.9   | -0.223  | 0.365   | 3249                 | 63.4         | 68.0      | 1191        | 69.5 | 204         | 68.3 | 17/1089            | 68.7 | -              | -    |
| <i>Phreagena okutanii</i> <sup>1</sup>         | <i>Phreagena</i>   | AP014555         | 16,336*     | 65.6   | -0.230  | 0.405   | 3833                 | 64.0         | 68.1      | 1191        | 69.7 | 861         | 67.7 | 23/1277            | 68.9 | -              | -    |
| <i>Phreagena soyocae</i> <sup>2</sup>          | <i>Phreagena</i>   | AP014558         | 12,941*     | 64.9   | -0.223  | 0.365   | 3249                 | 63.4         | 67.9      | 1190        | 69.5 | 204         | 68.1 | 17/1089            | 68.7 | -              | -    |
| <i>Pliocardia stearnsii</i> <sup>2</sup>       | <i>Pliocardia</i>  | AP014559         | 13,012*     | 67.7   | -0.230  | 0.402   | 3265                 | 66.6         | 72.7      | 1201        | 71.6 | 203         | 69.5 | 17/1096            | 69.1 | -              | -    |

Note:

\*indicates incomplete mitogenomes.

<sup>1</sup> Incomplete mitogenomes for which the control region was not sequenced.

<sup>2</sup> Incomplete mitogenomes for which *nad2*, *nad4l*, *nad6*, a few tRNA genes and the control region were not sequenced.

<https://doi.org/10.1371/journal.pone.0217952.t002>

*atp8* genes, and *rrnS* is located between *tRNA<sup>Thr</sup>* and *tRNA<sup>Met</sup>*. The largest known *rrnL* and *rrnS* genes are 1,226 bp in *Ar. pacifica* and 935 bp in *C. magnifica*, respectively [33–35].

Twenty-two tRNA genes were identified in the mitogenome of *C. marissinica*, which is typical for metazoans. However, the number of tRNA genes varies among other vesicomyid bivalves (Table 2). The length of tRNA genes in *C. marissinica* ranges from 61 (*tRNA<sup>His</sup>* and *tRNA<sup>Thr</sup>*) to 69 (*tRNA<sup>Ser (AGA)</sup>*) bp (Table 1), and the AT content of the tRNA genes is 68.7%. The secondary structures of tRNA genes are schematized in S1 Fig. Generally, a typical tRNA clover-leaf structure includes a 7–8 bp aminoacyl acceptor stem, a 3–5 bp TψC stem, a 5 bp anticodon stem and a 4 bp DHU stem. In the present study, most of the tRNA genes had the



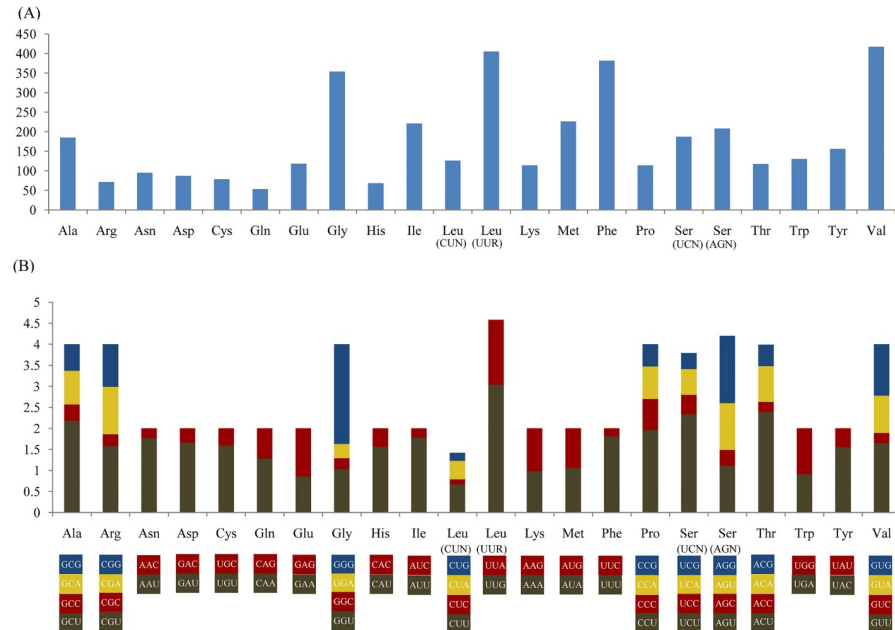

**Fig 2. Codon usage (A) and the relative synonymous codon usage (RSCU) (B) of the *C. marissinica* mitogenome.** Numbers to the left refer to the total number of codons (A) and the RSCU values (B). Codon families are provided on the X axis.

<https://doi.org/10.1371/journal.pone.0217952.g002>

typical secondary structure, except for *tRNA<sup>His</sup>*, *tRNA<sup>Thr</sup>*, *tRNA<sup>Tyr</sup>*, *tRNA<sup>Ser(UCA)</sup>* and *tRNA<sup>Ser(AGA)</sup>*. In *tRNA<sup>His</sup>*, *tRNA<sup>Thr</sup>* and *tRNA<sup>Tyr</sup>*, the TψC loops are incomplete, which is not observed in other vesicomyid bivalves [34–36], and this feature might be a specific character in the *C. marissinica* mitogenome. In *tRNA<sup>Ser(UCA)</sup>* and *tRNA<sup>Ser(AGA)</sup>*, the DHU stems are reduced to a simple loop, as in many other bivalve mitogenomes [34,67]. Many studies have shown that the incomplete clover-leaf secondary structure of tRNA genes is common in metazoan mitogenomes and that aberrant tRNA genes can still function normally through posttranscriptional RNA editing and/or coevolved interacting factors [68–70]. Additionally, several mismatch pairs were detected within amino acid acceptors and anticodon stems in tRNA genes of *C. marissinica*. Such mismatches seem to be ubiquitous phenomena in the mitogenomes of many organisms and can also be corrected by posttranscriptional RNA editing [58,66,71–72].

### Noncoding regions and gene arrangement

A total of 23 noncoding regions (totaling 2,216 bp) are distributed in the *C. marissinica* mitogenome. The longest noncoding region (1,676 bp), located between *tRNA<sup>Trp</sup>* and *nad6*, corresponds to the control region identified in most other vesicomyids. The nucleotide content of the 1,676 bp control region is 34.25% A, 39.02% T, 16.29% G, and 10.44% C. The A + T content (73.27%) of this region is higher than that of other regions in the *C. marissinica* mitogenome (Table 2). In general, the mitochondrial control region is subjected to less evolutionary pressure than PCGs and thus has the highest variation in the whole mitogenome [73–74].

Additionally, in the mitochondrial control region of *C. marissinica*, we found a tandemly arranged repeated sequence, which was 354 bp in length (positions 12,675–13,028), including three identical tandem repeat units of 118 bp (Fig 3). The tandem repeat sequence could be folded into stem-loop secondary structures with minimized free energy (Fig 3), which is a common phenomenon in invertebrates [16,63,66,75]. The control region in the mitogenome

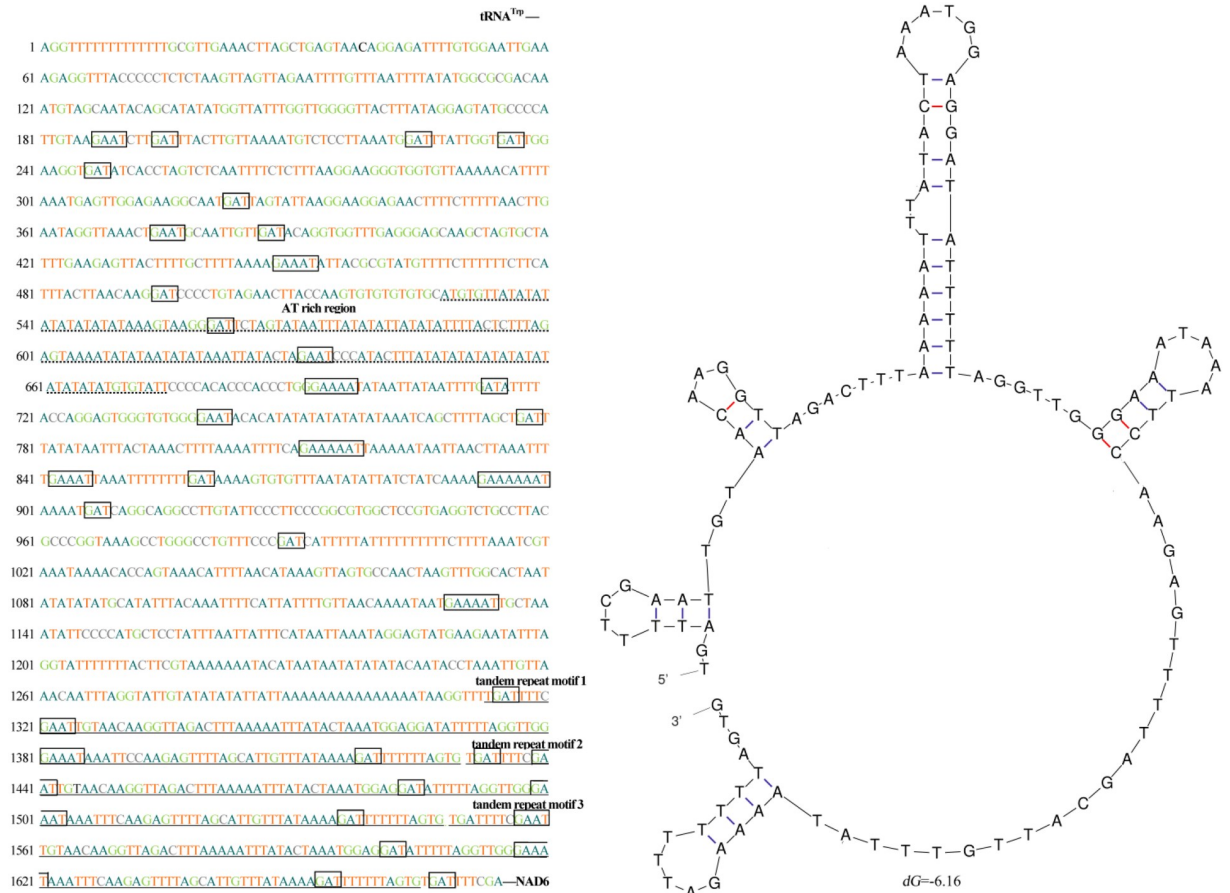

**Fig 3. Nucleotide sequences and stem-loop structures of the tandem repeat motifs in the control region (CR) of the *C. marissinica* mitogenome.** The CR is flanked by sequences encoding *tRNA<sup>Tyr</sup>* and *nad6*. The CR consists of certain patterns, such as special  $(G(A)_nT)$  motifs (marked with a box), AT-rich regions and tandem repeat motifs.

<https://doi.org/10.1371/journal.pone.0217952.g003>

is essential for transcription and replication in animals [76–77]. Therefore, the stem-loop structures mentioned above may play an important role in gene replication and regulation. In addition, some other peculiar patterns, such as special “ $(G(A)_nT)$ ” motifs and AT-rich sequences, were observed in the control region of the *C. marissinica* mitogenome (Fig 3). Furthermore, similar characteristics (e.g., repetitive elements,  $(G(A)_nT)$  motifs and AT-rich sequences) were also observed in the deep-sea anemone *Bolocera* sp., alvinocaridid shrimp *Shinkaicaris leurokolos* and spongiolid shrimp *Spongiocaris panglao* [16,63,66]. In view of the particularity of the deep-sea chemosynthetic environment, we speculate that these special control region elements are involved in the regulation of replication and transcription of the mitogenome and may play some role in helping organisms adapt to extreme deep-sea habitats.

In contrast to other metazoans, the Mollusca showed frequent and extensive variation in gene arrangement, and among them, bivalves showed more gene order variation in their mitogenomes [78–80]. Here, a comparison of the *C. marissinica* mitogenome with the other twelve Heterodonta mitogenomes is shown in Fig 4. All thirteen Heterodonta mitogenomes come from two orders (five families): Myoida (family Hiattellidae) and Veneroida (family Tellinidae, family Mactridae, family Veneridae and family Vesicomyidae). Among the Heterodonta mitogenomes analyzed in the present study, the gene arrangement has a distinct difference between

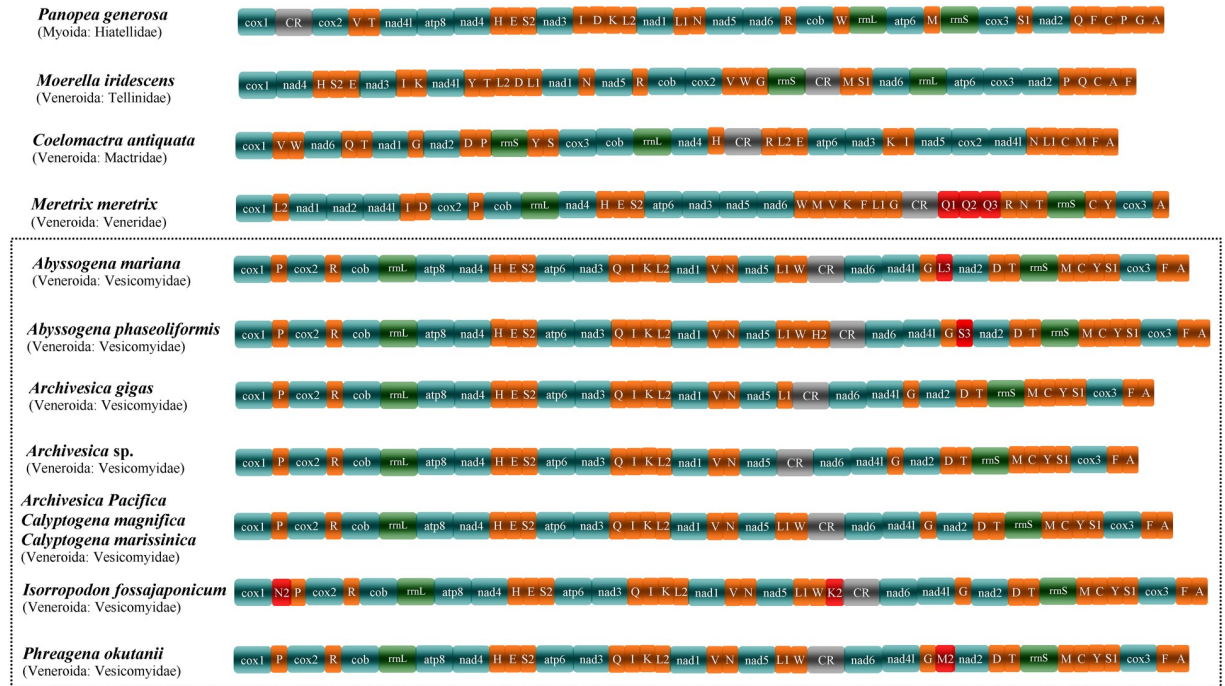

**Fig 4. Mitochondrial gene arrangement of 13 species in the subclass Heterodonta (*Panopea generosa*, *Moerella iridescens*, *Coelomactra antiquata*, *Meretrix meretrix* and 9 vesicomyid bivalves).** CR indicates the control region. Genes for tRNAs are displayed by a single letter for the corresponding amino acid, with two leucine tRNAs and two serine tRNAs differentiated by numerals. Uniquely derived gene positions of individual species are depicted in red. Sequence segments are not drawn to scale.

<https://doi.org/10.1371/journal.pone.0217952.g004>

the family Vesicomyidae and other species (Fig 4). In the family Vesicomyidae, we found that if the tRNA genes are not considered, the nine vesicomyid bivalves have a completely identical gene arrangement of PCGs. When compared to the “standard” mitogenome of *Ar. pacifica*, *C. magna* and *C. marissinica*, several additional tRNA genes were identified in *Ab. mariana* ( $tRNA^{Leu3}$ ), *Ab. phaseoliformis* ( $tRNA^{His2}$  and  $tRNA^{Ser3}$ ), *I. fossajaponicum* ( $tRNA^{Asn2}$  and  $tRNA^{Lys2}$ ) and *Ph. okutanii* ( $tRNA^{Met2}$ ) (Fig 4). As a general rule, additional gene copies usually obtained by gene replication and different gene copies would share some sequence identity with each other. However, analysis showed that the aforementioned additional tRNA genes have low similarity to other tRNA genes that encode the same tRNAs [34]. The remodeling of tRNA genes, DNA shuffling and the point mutations in the anticodons may all provide chances for tRNA gene rearrangement within mitogenomes [3,81–82]. Furthermore, gene rearrangements usually occurred around the control regions, which are considered the replication origins. Perhaps gene replication events occur frequently in this region, and consequently, more novel gene arrangements will be found in this region. To date, there are four known mechanisms of gene rearrangements in mitogenomes: inversion, transposition, reverse transposition and tandem duplication-random losses (TDRs) [83–84]. However, the specific mechanism of significant differences in mitochondrial gene arrangements in mollusks has not been completely clarified. With the determination of mitogenomes in more species of this phylum, the mechanism of large-scale rearrangement of mitochondrial genes in mollusks will be identified by further comparing and summarizing the rules of gene arrangement among different species.

## Phylogenetic relationships

Since several vesicomysid bivalves have incomplete mitogenomes at present, phylogenetic analyses were performed based on nucleotide and amino acid sequences of 9 mitochondrial PCGs (*atp6*, *cox1*, *cox2*, *cox3*, *cob*, *nad1*, *nad3*, *nad4*, and *nad5*) and 2 rRNA genes by maximum likelihood (ML) and Bayesian inference (BI) methods (Fig 5, S2–S4 Figs). The tree topologies resulting from the BI and ML analyses were not the same. There are two potential reasons for this discrepancy: one is that the presence of noncoding rRNA genes made the databases of nucleotides and amino acids different, and the other is the fact that several clades are represented by only one or two species each. The phylogenetic analyses clustered *C. marissinica* with the previously reported vesicomysid bivalves with high support values (Fig 5). In all phylogenetic trees, the family Vesicomysidae first clustered well with Veneridae and then united with Mactridae, which corroborates earlier studies of phylogenetic relationships based on the concatenated 12 PCGs and 2 rRNA genes [34–36]. *Calyptogena (sensu lato)* is the most diverse group of deep-sea vesicomysid bivalves in the western Pacific region and its marginal seas. Until now, the composition, evolutionary position and level of the genus *Calyptogena* have been the subject of discussion [85–87]. Phylogenetic reconstruction using the cytochrome oxidase *c* subunit I (*cox1*) gene showed that *C. marissinica* was clearly nested within a fully supported monophyletic clade corresponding to *Calyptogena sensu lato* and consisting of all included *Calyptogena (sensu lato)* species [32]. Notably, in our studies, *C. marissinica* showed a close genetic relationship with the *Akebiconcha* species (Fig 5). Therefore, additional mitogenomes of a greater number of vesicomysid bivalves, combined with morphological characters, are necessary to determine the phylogenetic relationships among members of this family.

## Positive selection analysis

Purifying selection is the predominant force in the evolution of mitogenomes, but because mitochondria are the main sites of aerobic respiration and are essential for energy metabolism, weak and/or episodic positive selection may occur against this background of strong purifying selection under reduced oxygen availability or greater energy requirements [88–89]. As proven by many studies, mitochondrial PCGs underwent positive selection in animals that survived in hypoxic environments or had higher energy demands for locomotion, such as Tibetan humans, Ordovician bivalves, diving cetaceans and flying insects [19, 90–92].

Considering that the deep-sea chemosynthetic ecosystems may impact the function of mitochondrial genes, we examined potential positive selection in the Vesicomysidae lineage using CodeML from the PAML package. Although different tree-building methods were used, the results of positive selection analyses were generally consistent (Table 3). In the analysis of branch models, the  $\omega$  ( $dN/dS$ ) ratio calculated under the one-ratio model ( $M_0$ ) was 0.02272 for the 13 mitochondrial PCGs of sampled Heterodonta bivalves, suggesting that these genes have experienced constrained selection pressure to maintain function. Then, in the comparison of the one-ratio model ( $M_0$ ) and the free-ratio model ( $M_1$ ), the LRTs indicated that the free-ratio model fit the data better than the one-ratio model (Table 3), which means that the  $\omega$  ratios are indeed different among lineages. Furthermore, the two-ratio model ( $M_2$ ) was also found to fit the data better than the one-ratio model (Table 3) when the family Vesicomysidae was set as a foreground branch. The  $\omega$  ratio of the Vesicomysidae branch was almost treble that of other branches ( $\omega_1 = 0.06398$  and  $\omega_0 = 0.02278$ ), indicating divergence in selection pressure between vesicomysid bivalves and other shallow-sea Heterodonta species. However, the  $\omega$  ratio of the family Vesicomysidae ( $\omega_1 = 0.06398$ ) was still significantly less than 1. This result is consistent with the known functional significance of mitochondria as a respiration chain necessary for electron transport and OXPHOS [93].

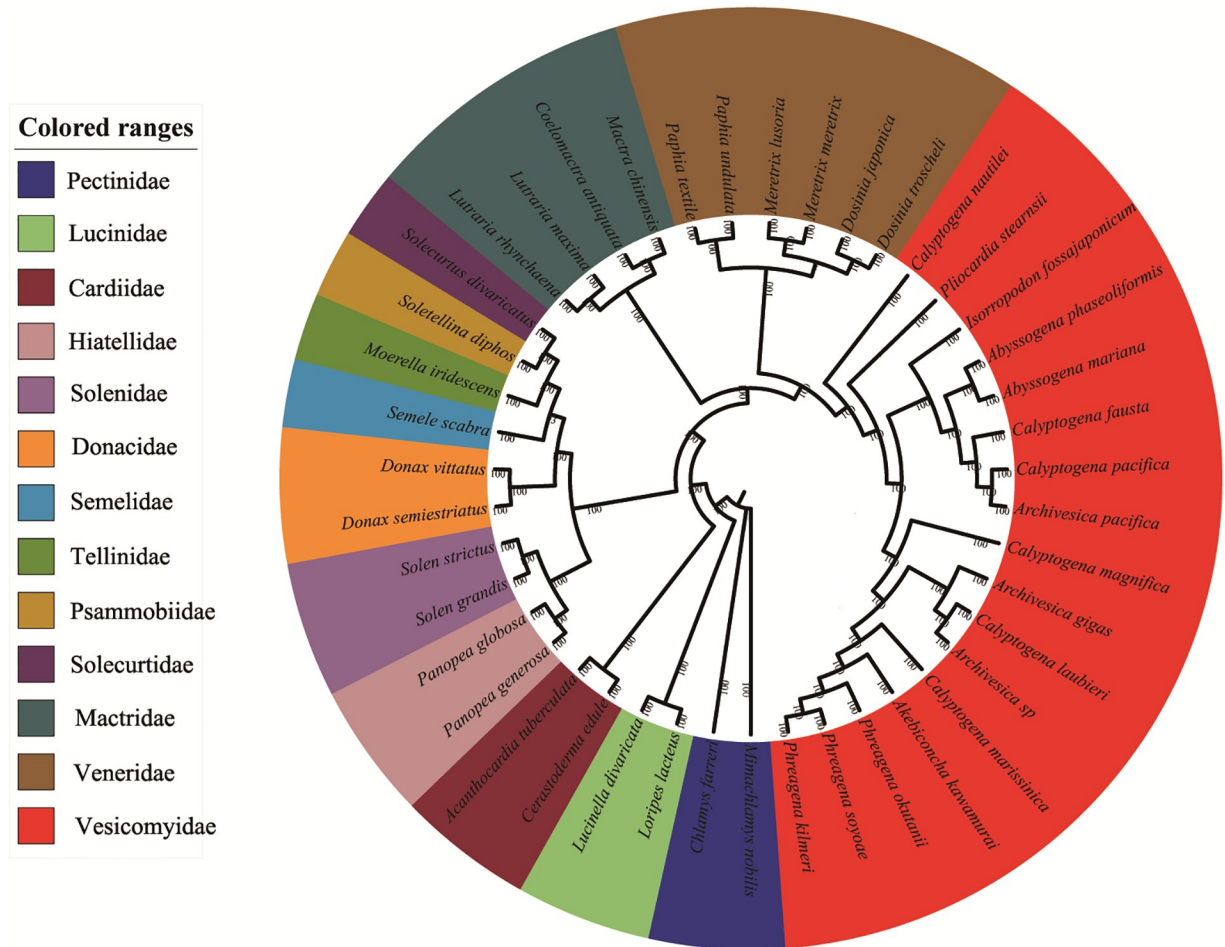

**Fig 5. Phylogenetic tree derived from Bayesian analyses based on concatenated nucleotide sequences of 9 mitochondrial PCGs (*cox1*, *cox2*, *cox3*, *cob*, *atp6*, *nad1*, *nad4*, *nad5*, and *nad6*) and 2 ribosomal RNA genes (*rrnS* and *rrnL*).** Numbers on branches are Bayesian posterior probabilities (percent). Two Pectinidae species belonging to the subclass Pteriomorpha were used as outgroups.

<https://doi.org/10.1371/journal.pone.0217952.g005>

Moreover, many studies have shown that positive selection often occurs over a short period of evolutionary time and acts on only a few sites; thus, the signal for positive selection is usually swamped by those for continuous purifying selection that occur on most sites in a gene sequence [88,94]. In the present study, branch-site models were used to detect possible positively selected sites in the vesicomyid bivalves (Table 4). Ten residues, which were located in *cox1*, *cox3*, *cob*, *nad2*, *nad4* and *nad5*, were identified as positively selected sites with high BEB values (> 95%).

It is well known that mitochondrial PCGs play a key role in the oxidative phosphorylation pathway; the above ten amino acid mutation sites are components of the respiratory chain and therefore may have important functions. As the first and the largest enzyme complex in the respiratory chain, the NADH dehydrogenase complex exercises the functions of proton pumps, and variation in loci may interfere with the efficiency of the proton-pumping process, which then affect metabolic performance [91]. In this work, there were four positively selected sites located in the *nad2*, *nad4* and *nad5* genes (subunits 2, 4 and 5 of NADH dehydrogenase). Under the deep-sea chemosynthetic environment, survival may require a modified and adapted energy metabolism, and evidences of adaptive evolution in the NADH dehydrogenase complex

Table 3. CODEML analyses of selection pressure on mitochondrial genes in the Vesicomyidae lineage.

| Trees              | Models     | lnL          | Parameter estimates                                                                                                                                    | Models compared                                                                                                                                        | 2ΔL        | p-value |
|--------------------|------------|--------------|--------------------------------------------------------------------------------------------------------------------------------------------------------|--------------------------------------------------------------------------------------------------------------------------------------------------------|------------|---------|
| Branch models      |            |              |                                                                                                                                                        |                                                                                                                                                        |            |         |
| Bayesian tree      | M0         | -203672.1001 | $\omega = 0.02272$                                                                                                                                     |                                                                                                                                                        |            |         |
|                    | Two-ratio  | -203666.6298 | $\omega_0 = 0.02278 \omega_1 = 0.06398$                                                                                                                | Two-ratio vs. M0                                                                                                                                       | 10.94072   | 0.00094 |
|                    | Free-ratio | -202667.8186 |                                                                                                                                                        | Free-ratio vs. M0                                                                                                                                      | 2008.56299 | 0.00000 |
| ML tree            | M0         | -203672.1001 | $\omega = 0.02272$                                                                                                                                     |                                                                                                                                                        |            |         |
|                    | Two-ratio  | -203666.6298 | $\omega_0 = 0.02278 \omega_1 = 0.06398$                                                                                                                | Two-ratio vs. M0                                                                                                                                       | 10.94072   | 0.00094 |
|                    | Free-ratio | -202747.0065 |                                                                                                                                                        | Free-ratio vs. M0                                                                                                                                      | 1850.18729 | 0.00000 |
| Branch-site models |            |              |                                                                                                                                                        |                                                                                                                                                        |            |         |
| Bayesian tree      | Null model | -202664.0952 | $P_0 = 0.77667 P_1 = 0.02562 P_{2a} = 0.19139 P_{2b} = 0.00631$<br>$\omega_0 = 0.02110 \omega_1 = 1.00000 \omega_{2a} = 1.00000 \omega_{2b} = 1.00000$ |                                                                                                                                                        |            |         |
|                    | Model A    | -202663.7531 | $P_0 = 0.78464 P_1 = 0.02590 P_{2a} = 0.18340 P_{2b} = 0.00605$<br>$\omega_0 = 0.02115 \omega_1 = 1.00000 \omega_{2a} = 1.21998 \omega_{2b} = 1.21998$ | Model A vs. Null model                                                                                                                                 | 0.68422    | 0.40814 |
|                    | ML tree    | Null model   | -202664.0952                                                                                                                                           | $P_0 = 0.77667 P_1 = 0.02562 P_{2a} = 0.19140 P_{2b} = 0.00631$<br>$\omega_0 = 0.02110 \omega_1 = 1.00000 \omega_{2a} = 1.00000 \omega_{2b} = 1.00000$ |            |         |
| ML tree            | Model A    | -202663.7531 | $P_0 = 0.77667 P_1 = 0.02562 P_{2a} = 0.19139 P_{2b} = 0.00631$<br>$\omega_0 = 0.02115 \omega_1 = 1.00000 \omega_{2a} = 1.22003 \omega_{2b} = 1.22003$ | Model A vs. Null model                                                                                                                                 | 0.68422    | 0.40814 |

<https://doi.org/10.1371/journal.pone.0217952.t003>

have been reported in mitogenome of Tibetan horses, Chinese snub-nosed monkeys and Tibetan loaches [20,22,25]. Two residues in the *cob* gene were identified to be under positive selection. As a relatively conserved gene, *cob* plays a fundamental role in energy production in mitochondria. It catalyzes reversible electron transfer from ubiquinol to cytochrome *c* coupled to proton translocation [95]. Wide variation in the properties of amino acids was observed in functionally important regions of *cob* in species with more specialized metabolic requirements, such as adaptation to a low-energy diet or large body size and adaptation to unusual oxygen requirements or low-temperature environments [91,96]. Cytochrome *c* oxidase, which catalyzes the terminal reduction of oxygen and whose catalytic core is encoded by three mitochondrial protein-coding genes (*cox1*, *cox2* and *cox3*), has been proven to be a particularly important target of positive selection during hypoxia adaptation [97–98]. Studies have shown that when cells of the organisms are exposed to anoxia, the cytochrome *c* oxidase are required for the produced reactive oxygen species (ROS), and the increase in ROS concentration serves to stabilize Hif-1 $\alpha$ , which then leads to the induction of Hif-1-dependent nuclear hypoxic

Table 4. Possible sites under positive selection in the Vesicomyidae lineage.

| Bayesian tree |       |            |            | ML tree     |       |            |            |
|---------------|-------|------------|------------|-------------|-------|------------|------------|
| Gene          | Codon | Amino acid | BEB values | Gene        | Codon | Amino acid | BEB values |
| <i>cox1</i>   | 529   | W          | 0.967      | <i>cox1</i> | 529   | W          | 0.967      |
| <i>cox3</i>   | 998   | G          | 0.956      | <i>cox3</i> | 998   | G          | 0.956      |
|               | 1018  | W          | 0.962      |             | 1018  | W          | 0.962      |
|               | 1021  | T          | 0.954      |             | 1021  | T          | 0.954      |
| <i>cob</i>    | 1131  | K          | 0.982      | <i>cob</i>  | 1131  | K          | 0.982      |
|               | 1432  | A          | 0.959      |             | 1432  | A          | 0.959      |
| <i>nad2</i>   | 2043  | K          | 0.960      | <i>nad2</i> | 2043  | K          | 0.960      |
| <i>nad4</i>   | 2388  | E          | 0.951      | <i>nad4</i> | 2388  | E          | 0.951      |
| <i>nad5</i>   | 2734  | P          | 0.975      | <i>nad5</i> | 2734  | P          | 0.975      |
|               | 2773  | S          | 0.951      |             | 2773  | S          | 0.951      |

<https://doi.org/10.1371/journal.pone.0217952.t004>

genes [99–100]. Four positively selected residues were detected in the *cox1* and *cox3* genes. For *C. marissinica*, functional modification mediated by positively selected mutations may increase the affinity between the enzyme and oxygen, thus allowing the efficient utilization of oxygen under hypoxia and maintaining essential metabolic levels.

The environment of deep-sea hydrothermal vents and cold seeps is characterized by darkness, a lack of photosynthesis-derived nutrients, high hydrostatic pressure, variable temperatures, low dissolved oxygen, and high concentrations of hydrogen sulfide (H<sub>2</sub>S), methane (CH<sub>4</sub>) and heavy metals, such as iron, copper and zinc [9, 101]. Previous studies have confirmed that all of the above environmental factors influence the process of mitochondrial aerobic respiration; for example, thirty potentially important adaptive residues were identified in the mitogenome of *S. leurokolos* and revealed the mitochondrial genetic basis of hydrothermal vent adaptation in alvinocaridid shrimp [16]. Similar findings have been reported in other deep-sea macrobenthos, such as the sea anemone *Bolocera* sp., starfish *Freyastera benthophila* and sea cucumber *Benthodytes marianensis* [66,102–103]. In the present study, ten potentially adaptive residues were identified in the *cox1*, *cox3*, *cob*, *nad2*, *nad4* and *nad5* genes, supporting the adaptive evolution of the mitogenome of *C. marissinica*. Our results establishes a necessary foundation to understand how the deep-sea vesicomyid bivalves maintain aerobic respiration for sufficient energy in harsh deep-sea chemosynthetic environment at the mitochondrial level.

## Conclusion

This study characterized the complete mitogenome of the deep-sea vesicomyid bivalve *C. marissinica*, which is 17,374 bp in length and encodes 37 typical mitochondrial genes, including 13 PCGs, 2 rRNA genes, and 22 tRNA genes. All of these genes are encoded on the heavy strand. We analyzed the mitogenome organization, codon usage, control region features, gene arrangement, phylogenetic relationships and positive selection of *C. marissinica*. In the mitogenome of *C. marissinica*, tandem repeat sequences, “G(A)<sub>n</sub>T” motifs and AT-rich sequences were detected. In the family Vesicomyidae, we found that if the tRNA genes are not considered, the sequenced vesicomyid bivalves have a completely identical arrangement of PCGs. The phylogenetic analyses clustered *C. marissinica* with previously reported vesicomyid bivalves with high support values. Ten residues located in *cox1*, *cox3*, *cob*, *nad2*, *nad4* and *nad5* were inferred to be positively selected sites along the branches leading to vesicomyid bivalves, which may indicate that the genes were under positive selection pressure. The findings of this study could help deepen our understanding of the molecular mechanisms of adaptive evolution at the mitochondrial level in deep-sea organisms.

## Supporting information

**S1 Table. Species used for phylogenetic reconstructions.**  
(DOCX)

**S2 Table. Species used for CodeML analyses of selective pressure on mitochondrial genes.**  
(DOCX)

**S1 Fig. Putative secondary structures for the 22 transfer RNAs of the *C. marissinica* mitogenome.**  
(TIF)

**S2 Fig. Phylogenetic trees derived from ML analyses based on nucleotide sequences of 9 mitochondrial protein-coding genes and 2 ribosomal RNA genes.**  
(TIF)

**S3 Fig. Phylogenetic trees derived from Bayesian analyses based on amino acid sequences of 9 mitochondrial protein-coding genes.**

(TIF)

**S4 Fig. Phylogenetic trees derived from ML analyses based on amino acid sequences of 9 mitochondrial protein-coding genes.**

(TIF)

## Acknowledgments

The authors thank the captains and crews of the R/V Tan Suo Yi Hao and the pilots of the HOV “Shen Hai Yong Shi” for technical support.

## Author Contributions

**Conceptualization:** Mei Yang, Xinzheng Li.

**Data curation:** Mei Yang, Xinzheng Li.

**Formal analysis:** Mei Yang.

**Funding acquisition:** Mei Yang, Lin Gong, Xinzheng Li.

**Investigation:** Mei Yang, Lin Gong, Jixing Sui, Xinzheng Li.

**Methodology:** Mei Yang.

**Project administration:** Xinzheng Li.

**Resources:** Mei Yang, Xinzheng Li.

**Software:** Mei Yang.

**Supervision:** Mei Yang, Xinzheng Li.

**Validation:** Mei Yang, Jixing Sui, Xinzheng Li.

**Visualization:** Mei Yang, Xinzheng Li.

**Writing – original draft:** Mei Yang, Xinzheng Li.

**Writing – review & editing:** Mei Yang, Xinzheng Li.

## References

1. Martijn J, Vosseberg J, Guy L, Offre P, Ettema TJG. Deep mitochondrial origin outside the sampled alphaproteobacteria. *Nature*. 2018; 557: 101–105. <https://doi.org/10.1038/s41586-018-0059-5> PMID: 29695865
2. Wolstenholme DR. Animal mitochondrial DNA: Structure and evolution. *International Review of Cytology*. 1992; 141: 173–216. PMID: 1452431
3. Boore JL. Animal mitochondrial genomes. *Nucleic Acids Research*. 1999; 27: 1767–1780. <https://doi.org/10.1093/nar/27.8.1767> PMID: 10101183
4. Hebert P, Cywinska A, Ball S, Waard J. Biological identification through DNA barcodes. *Proceedings of the Royal Society B Biological Sciences*. 2002; 270: 313–321. <https://doi.org/10.1098/rspb.2002.2218> PMID: 12614582
5. Gissi C, Iannelli F, Pesole G. Evolution of the mitochondrial genome of Metazoa as exemplified by comparison of congeneric species. *Heredity*. 2008; 101: 301–320. <http://doi.org/10.1038/hdy.2008.62> PMID: 18612321
6. Tan MH, Gan HM, Lee YP, Linton S, Grandjean F, Bartholomei-Santos ML, et al. ORDER within the chaos: Insights into phylogenetic relationships within the Anomura (Crustacea: Decapoda) from mitochondrial sequences and gene order rearrangements. *Molecular Phylogenetics and Evolution*. 2018; 127: 320–331. <https://doi.org/10.1016/j.ympev.2018.05.015> PMID: 29800651



7. Schuster A, Vargas S, Knapp IS, Pomponi SA, Toonen RJ, Erpenbeck D, et al. Divergence times in demosponges (Porifera): first insights from new mitogenomes and the inclusion of fossils in a birth-death clock model. *BMC Evolutionary Biology*. 2018; 18: 114. <https://dx.doi.org/10.1186/s12862-018-1230-1> PMID: 30021516
8. Sibuet M, Olu K. Biogeography, biodiversity and fluid dependence of deep-sea cold-seep communities at active and passive margins. *Deep-Sea Research II: Topical Studies in Oceanography*. 1998; 45: 517–567.
9. Van Dover CL, German CR, Speer KG, Parson LM, Vrijenhoek RC. Evolution and Biogeography of Deep-Sea Vent and Seep Invertebrates. *Science*. 2002; 295: 1253–1257. <https://doi.org/10.1126/science.1067361> PMID: 11847331
10. Martin W, Baross J, Kelley D, Russell MJ. Hydrothermal vents and the origin of life. *Nature Review Microbiology*. 2008; 6: 805–814. <https://doi.org/10.1038/nrmicro1991> PMID: 18820700
11. Vrijenhoek RC. Genetic diversity and connectivity of deep-sea hydrothermal vent metapopulations. *Molecular Ecology*. 2010; 19: 4391–4411. <https://doi.org/10.1111/j.1365-294X.2010.04789.x> PMID: 20735735
12. Sun J, Zhang Y, Xu T, Zhang Y, Mu H, Zhang Y, et al. Adaptation to deep-sea chemosynthetic environments as revealed by mussel genomes. *Nature Ecology Evolution*. 2017; 1: 121. <https://doi.org/10.1038/s41559-017-0121> PMID: 28812709
13. Zheng P, Wang MX, Li CL, Sun XQ, Wang XC, Sun Y, et al. Insights into deep-sea adaptations and host-symbiont interactions: A comparative transcriptome study on *Bathymodiolus* mussels and their coastal relatives. *Molecular Ecology*. 2017; 26: 5133–5148. <https://doi.org/10.1111/mec.14160> PMID: 28437568
14. Hui M, Cheng J, Sha ZL. First comprehensive analysis of lysine acetylation in *Alvinocaris longirostris* from the deep-sea hydrothermal vents. *BMC Genomics*. 2018; 19: 352. <https://doi.org/10.1186/s12864-018-4745-3> PMID: 29747590
15. Lan Y, Sun J, Xu T, Chen C, Tian RM, Qiu JW, et al. *De novo* transcriptome assembly and positive selection analysis of an individual deep-sea fish. *BMC Genomics*. 2018; 19: 394. <https://doi.org/10.1186/s12864-018-4720-z> PMID: 29793428
16. Sun SE, Hui M, Wang MX, Sha ZL. The complete mitochondrial genome of the alvinocaridid shrimp *Shinkaicaris leurokolos* (Decapoda, Caridea): Insight into the mitochondrial genetic basis of deep-sea hydrothermal vent adaptation in the shrimp. *Comparative Biochemistry and Physiology-Part D*. 2018; 25: 42–52. <https://doi.org/10.1016/j.cbd.2017.11.002> PMID: 29145028
17. Wang ZF, Shi XJ, Sun LX, Bai YZ, Zhang DZ, Tang BP. Evolution of mitochondrial energy metabolism genes associated with hydrothermal vent adaptation of Alvinocaridid shrimps. *Genes Genomics*. 2017; 39: 1367–1376. <https://doi.org/10.1007/s13258-017-0600-1>
18. Plazzi F, Puccio G, Passamonti M. Burrowers from the Past: Mitochondrial Signatures of Ordovician Bivalve Infaunalization. *Genome Biology and Evolution*. 2017; 9: 956–967. <https://doi.org/10.1093/gbe/evx051> PMID: 28338965
19. Gu ML, Dong XQ, Shi L, Shi L, Lin KQ, Huang XQ, et al. Differences in mtDNA whole sequence between Tibetan and Han populations suggesting adaptive selection to high altitude. *Gene*. 2012; 496: 37–44. <https://doi.org/10.1016/j.gene.2011.12.016> PMID: 22233893
20. Yu L, Wang XP, Ting N, Zhang YP. Mitogenomic analysis of Chinese snub-nosed monkeys: Evidence of positive selection in NADH dehydrogenase genes in high-altitude adaptation. *Mitochondrion*. 2011; 11: 497–503. <https://doi.org/10.1016/j.mito.2011.01.004> PMID: 21292038
21. Xu SQ, Yang YZ, Zhou J, Jin GE, Chen YT, Wang J, et al. A mitochondrial genome sequence of the Tibetan antelope (*Pantholops hodgsonii*). *Genomics, proteomics & bioinformatics*. 2005; 3: 5–17. [https://doi.org/10.1016/S1672-0229\(05\)03003-2](https://doi.org/10.1016/S1672-0229(05)03003-2) PMID: 16144518
22. Ning T, Xiao H, Li J, Hua S, Zhang YP. Adaptive evolution of the mitochondrial ND6 gene in the domestic horse. *Genetics and Molecular Research*. 2010; 9: 144–150. <https://doi.org/10.4238/vol9-1gmr705> PMID: 20198570
23. Wang ZF, Yonezawa T, Liu B, Ma T, Shen X, Su JP, et al. Domestication relaxed selective constraints on the yak mitochondrial genome. *Molecular Biology and Evolution*. 2011; 28: 1553–1556. <https://doi.org/10.1093/molbev/msq336> PMID: 21156878
24. Zhou TC, Shen XJ, Irwin DM, Shen YY, Zhang YP. Mitogenomic analyses propose positive selection in mitochondrial genes for high-altitude adaptation in galliform birds. *Mitochondrion*. 2014; 18: 70–75. <https://doi.org/10.1016/j.mito.2014.07.012> PMID: 25110061
25. Wang Y, Shen YJ, Feng CG, Zhao K, Song ZB, Zhang YP, et al. Mitogenomic perspectives on the origin of Tibetan loaches and their adaptation to high altitude. *Scientific Reports*. 2016; 6: 29690. <https://doi.org/10.1038/srep29690> PMID: 27417983

26. Boss KJ, Turner RD. The giant white clam from the Galapagos Rift, *Calyptogena magnifica* species novum. *Malacologia*. 1980; 20: 161–194.
27. Bennett BA, Smith CR, Glaser B, Maybaum HL. Faunal community structure of achemoautotrophic assemblage on whale bones in the deep northeast Pacific Ocean. *Marine Ecology Progress*. 1994; 108: 205–223.
28. Cosel RV, Salas C, Høisæter T. Vesicomysidae (Mollusca: Bivalvia) of the genera *Vesicomys*, *Waisiuconcha*, *Isorropodon* and *Callogonia* in the eastern Atlantic and the Mediterranean. *Sarsia*, 86(4–5): 333–366. <https://doi.org/10.1080/00364827.2001.10425523>.
29. Krylova EM, Sahling H. Vesicomysidae (bivalvia): Current taxonomy and distribution. *PLoS One*. 2010; 5: e9957. <https://doi.org/10.1371/journal.pone.0009957> PMID: 20376362
30. Fisher CR. Chemoautotrophic and methanotrophic symbioses in marine invertebrates. *Reviews in Aquatic Sciences*. 1990; 2: 399–436.
31. Krylova EM, Drozdov AL, Mironov AN. Presence of bacteria in gills of hadal bivalve “*Vesicomys*” *sergeevi* Filatova, 1971. *Ruthenica*. 2000; 10: 76–79.
32. Chen C, Okutani T, Liang QY, Qiu JW. A Noteworthy New Species of the Family Vesicomysidae from the South China Sea (Bivalvia: Glossoidea). *Venus*. 2018; 76: 29–37.
33. Liu HL, Cai SY, Zhang HB, Vrijenhoek RC. Complete mitochondrial genome of hydrothermal vent clam *Calyptogena magnifica*. *Mitochondrial DNA Part A DNA Mapping, Sequencing, and Analysis*. 2015; 27: 4333–4335. <https://doi.org/10.3109/19401736.2015.1089488> PMID: 26462964
34. Liu HL, Cai SY, Liu J, Zhang HB. Comparative mitochondrial genomic analyses of three chemosynthetic vesicomysid clams from deep-sea habitats. *Ecology and Evolution*. 2018; 8: 7261–7272. <https://doi.org/10.1002/ece3.4153> PMID: 30151147
35. Ozawa G, Shimamura S, Takaki Y, Takishita K, Ikuta T, Barry JP, et al. Ancient occasional host switching of maternally transmitted bacterial symbionts of chemosynthetic vesicomysid clams. *Genome Biology and Evolution*. 2017; 9: 2226–2236. <https://doi.org/10.1093/gbe/evx166> PMID: 28922872
36. Ozawa G, Shimamura S, Takaki Y, Yokobori SI, Ohara Y, Takishita K, et al. Updated mitochondrial phylogeny of Pteriomorph and Heterodont Bivalvia, including deep-sea chemosymbiotic *Bathymodiolus* mussels, vesicomysid clams and the thyasirid clam *Conchocele cf. bisecta*. *Marine Genomics*. 2017; 31: 43–52. <https://doi.org/10.1016/j.margen.2016.09.003> PMID: 27720682
37. Haas BJ, Salzberg SL, Zhu W, Pertea M, Allen JE, Orvis J et al. Automated eukaryotic gene structure annotation using EVIDENCEModeler and the Program to Assemble Spliced Alignments. *Genome Biology*. 2008; 9: R7. <https://doi.org/10.1186/gb-2008-9-1-r7> PMID: 18190707
38. Lagesen K, Hallin P, Rødland EA, Stærfeldt HH, Rognes T, Ussery DW. RNAmmmer: consistent and rapid annotation of ribosomal RNA genes. *Nucleic Acids Research*. 2007; 35: 3100–3108. <https://doi.org/10.1093/nar/gkm160> PMID: 17452365
39. Lowe TM, Eddy SR. tRNAscan-SE: a program for improved detection of transfer RNA genes in genomic sequence. *Nucleic Acids Research*. 1997; 25: 955–964. <https://doi.org/10.1093/nar/25.5.0955> PMID: 9023104
40. Lohse M, Drechsel O, Bock R. OrganellarGenomeDRAW (OGDRAW): a tool for the easy generation of high-quality custom graphical maps of plastid and mitochondrial genomes. *Current Genetics*. 2007; 52: 267–274. <https://doi.org/10.1007/s00294-007-0161-y> PMID: 17957369
41. Librado P, Rozas J. DnaSP v5: A software for comprehensive analysis of DNA polymorphism data. *Bioinformatics*. 2009; 25: 1451–1452. <https://doi.org/10.1093/bioinformatics/btp187> PMID: 19346325
42. Perna NT, Kocher TD. Patterns of nucleotide composition at fourfold degenerate sites of animal mitochondrial genomes. *Journal of Molecular Evolution*. 1995; 41: 353–358. <https://doi.org/10.1007/bf00186547> PMID: 7563121
43. Benson G. Tandem repeats finder: a program to analyze DNA sequences. *Nucleic Acids Research*. 1999; 27: 573–580. <https://doi.org/10.1093/nar/27.2.573> PMID: 9862982
44. Zuker M. Mfold web server for nucleic acid folding and hybridization prediction. *Nucleic Acids Research*. 2003; 31: 3406–3415. <https://doi.org/10.1093/nar/gkg595> PMID: 12824337
45. Talavera G, Castresana J. Improvement of phylogenies after removing divergent and ambiguously aligned blocks from protein sequence alignments. *Systematic Biology*. 2007; 56: 564–577. <https://doi.org/10.1080/10635150701472164> PMID: 17654362
46. Darrriba D, Taboada GL, Doallo R, Posada D. jModelTest 2: more models, new heuristics and parallel computing. *Nature Methods*. 2012; 9: 772. <https://doi.org/10.1038/nmeth.2109> PMID: 22847109
47. Darrriba D, Taboada GL, Doallo R, Posada D. ProtTest 3: fast selection of best-fit models of protein evolution. *Bioinformatics*. 2011; 27: 1164–1165. <https://doi.org/10.1093/bioinformatics/btr088> PMID: 21335321

48. Stamatakis A. RAxML version 8: a tool for phylogenetic analysis and post-analysis of large phylogenies. *Bioinformatics*. 2014; 30: 1312–1313. <https://doi.org/10.1093/bioinformatics/btu033> PMID: 24451623
49. Ronquist F, Teslenko M, van der Mark P, Ayres DL, Darling A, Höhna S. MrBayes 3.2: efficient bayesian phylogenetic inference and model choice across a large model space. *Systematic Biology*. 2012; 61: 539–542. <https://doi.org/10.1093/sysbio/sys029> PMID: 22357727
50. Ohta T. The nearly neutral theory of molecular evolution. *Annual Review of Ecology and Systematics*. 1992; 23: 263–286. <https://www.jstor.org/stable/2097289>
51. Yang Z. Likelihood ratio tests for detecting positive selection and application to primate lysozyme evolution. *Molecular Biology and Evolution*. 1998; 15: 568–573. <https://doi.org/10.1093/oxfordjournals.molbev.a025957> PMID: 9580986
52. Yang Z. PAML 4: a program package for phylogenetic analysis by maximum likelihood. *Molecular Biology and Evolution*. 2007; 24: 1586–1591. <https://doi.org/10.1093/molbev/msm088> PMID: 17483113
53. Yang Z, Nielsen R, Goldman N, Pedersen AM. Codon-substitution models for heterogeneous selection pressure at amino acid sites. *Genetics*. 2000; 155: 431–449. PMID: 10790415
54. Nielsen R, Yang Z. Likelihood models for detecting positively selected amino acid sites and applications to the HIV-1 envelope gene. *Genetics*. 1998; 148: 929–936. PMID: 9539414
55. Yang Z, Wong WS, Nielsen R. Bayes empirical bayes inference of amino acid sites under positive selection. *Molecular Biology and Evolution*. 2005; 22: 1107–1118. <https://doi.org/10.1093/molbev/msi097> PMID: 15689528
56. Xu X, Wu X, Yu Z. The mitogenome of *Paphia euglypta* (Bivalvia: Veneridae) and comparative mitogenomic analyses of three venerids. *Genome*. 2010; 53: 1041–1052. <https://doi.org/10.1139/G10-096> PMID: 21164537
57. Liao F, Wang L, Wu S, Li YP, Zhao L, Huang GM, et al. The complete mitochondrial genome of the fall webworm, *Hyphantria cunea* (Lepidoptera: Arctiidae). *International Journal of Biological Sciences*. 2010; 6: 172–186. <https://doi.org/10.7150/ijbs.6.172> PMID: 20376208
58. Wang ZL, Chao L, Fang WY, Yu XP. The Complete Mitochondrial Genome of two *Tetragnatha* Spiders (Araneae: Tetragnathidae): Severe Truncation of tRNAs and Novel Gene Rearrangements in Araneae. *International Journal of Biological Sciences*. 2016; 12: 109–119. <https://doi.org/10.7150/ijbs.12358> PMID: 26722222
59. Ojala D, Montoya J, Attardi G. tRNA punctuation model of RNA processing in human mitochondria. *Nature*. 1981; 290: 470–474. <https://doi.org/10.1038/290470a0> PMID: 7219536
60. Dreyer H, Steiner G. The complete sequences and gene organisation of the mitochondrial genome of the heterodont bivalves *Acanthocardia tuberculata* and *Hiatella arctica*—and the first record for a putative *Atpase subunit 8* gene in marine bivalves. *Frontiers in Zoology*. 2006; 3: 13. <https://dx.doi.org/10.1186/1742-9994-3-13> PMID: 16948842
61. Salvato P, Simonato M, Battisti A, Negrisol E. The complete mitochondrial genome of the bag-shelter moth *Ochrogaster lunifer* (Lepidoptera, Notodontidae). *BMC Genomics*. 2008; 9: 331. <https://dx.doi.org/10.1186/1471-2164-9-331> PMID: 18627592
62. Yu H, Li Q. Complete mitochondrial DNA sequence of *Crassostrea nippona*: comparative and phylogenomic studies on seven commercial *Crassostrea* species. *Molecular Biology Reports*. 2012; 39: 999–1009. <https://doi.org/10.1007/s11033-011-0825-z> PMID: 21562763.
63. Sun SE, Sha ZL, Wang YR. Complete mitochondrial genome of the first deep-sea spongiolid shrimp *Spongiocaris panglao* (Decapoda: Stenopodidea): Novel gene arrangement and the phylogenetic position and origin of Stenopodidea. *Gene*. 2018; 676: 123–138. <https://doi.org/10.1016/j.gene.2018.07.026> PMID: 30021129
64. Brown WM. The mitochondrial genome of animals. In: *Molecular Evolutionary Genetics*. New York: Plenum Press; 1985.
65. Chai HN, Du YZ, Zhai BP. Characterization of the complete mitochondrial genome of *Cnaphalocrocis medinalis* and *Chilo suppressalis* (Lepidoptera: Pyralidae). *International Journal of Biological Sciences*. 2012; 8: 561–579. <https://doi.org/10.1007/s10126-005-0004-0> PMID: 22532789
66. Zhang B, Zhang YH, Wang X, Zhang HX, Lin Q. The mitochondrial genome of a sea anemone *Bolocera* sp. exhibits novel genetic structures potentially involved in adaptation to the deep-sea environment. *Ecology and Evolution*. 2017; 7: 4951–4962. <https://doi.org/10.1002/ece3.3067> PMID: 28690821
67. Plazzi F, Ribani A, Passamonti M. The complete mitochondrial genome of *Solemya velum* (Mollusca: Bivalvia) and its relationships with conchifera. *BMC Genomics*. 2013; 14: 409. <https://doi.org/10.1186/1471-2164-14-409> PMID: 23777315

68. Okimoto R, Macfarlane JL, Clary DO, Wolstenholme DR. The mitochondrial genomes of two nematodes, *Caenorhabditis elegans* and *Ascaris suum*. *Genetics*. 1992; 130: 471–498. PMID: [1551572](#)
69. Ohtsuki T, Kawai G, Watanabe K. The minimal tRNA: unique structure of *Ascaris suum* mitochondrial tRNA(Ser)(UCU) having a short T arm and lacking the entire D arm. *FEBS Letter*. 2002; 514: 37–43. [https://doi.org/10.1016/s0014-5793\(02\)02328-1](https://doi.org/10.1016/s0014-5793(02)02328-1) PMID: [11904178](#)
70. Chimnarok S, Gravers Jeppesen M, Suzuki T, Nyborg J, Watanabe K. Dualmode recognition of non-canonical tRNAs(Ser) by seryl-tRNA synthetase in mammalian mitochondria. *Embo Journal*. 2005; 24: 3369–3379. <https://doi.org/10.1038/sj.emboj.7600811> PMID: [16163389](#)
71. Lavrov DV, Brown WM, Boore JL. A novel type of RNA editing occurs in the mitochondrial tRNAs of the centipede *Lithobius forficatus*. *Proceedings of the National Academy of Sciences of the United States of America*. 2000; 97: 13738–13742. <https://doi.org/10.1073/pnas.250402997> PMID: [11095730](#)
72. Miller AD, Murphy NP, Burrige CP, Austin CM. Complete mitochondrial DNA sequences of the decapod crustaceans *Pseudocarcinus gigas* (Menippidae) and *Macrobrachium rosenbergii* (Palaemonidae). *Marine Biotechnology*. 2005; 7: 339–349. <https://doi.org/10.1007/s10126-004-4077-y> PMID: [15902543](#)
73. Aquadro CF, Greenberg BD. Human mitochondrial DNA variation and evolution: Analysis of nucleotide sequences from seven individuals. *Genetics*. 1983; 103: 287–312. PMID: [6299878](#)
74. Marshall HD, Baker AJ. Structural conservation and variation in the mitochondrial control region of fringilline finches (*Fringilla* spp.) and the greenfinch (*Carduelis chloris*). *Molecular Biology and Evolution*. 1997; 14: 173–184. <https://doi.org/10.1093/oxfordjournals.molbev.a025750> PMID: [9029795](#)
75. Flot JF, Tillier S. The mitogenome of *Pocillopora* (Cnidaria: Scleractinia) contains two variable regions: The putative D-loop and a novel ORF of unknown function. *Gene*. 2007; 401: 80–87. <https://doi.org/10.1016/j.gene.2007.07.006> PMID: [17716831](#)
76. Stanton DJ, Daehler LL, Moritz CC, Brown WM. Sequences with the potential to form stem-and-loop structures are associated with coding-region duplications in animal mitochondrial DNA. *Genetics*. 1994; 137: 233–241. PMID: [8056313](#)
77. Fernández-Silva P, Enriquez JA, Montoya J. Replication and transcription of mammalian mitochondrial DNA. *Experimental Physiology*. 2003; 88: 41–56. PMID: [12525854](#)
78. Serb JM, Lydeard C. Complete mtDNA sequence of the north American freshwater mussel, *Lampsilis ornata* (Unionidae): an examination of the evolution and phylogenetic utility of mitochondrial genome organization in Bivalvia (Mollusca). *Molecular Biology and Evolution*. 2003; 20: 1854–1866. <https://doi.org/10.1093/molbev/msg218> PMID: [12949150](#)
79. Ren J, Shen X, Jiang F, Liu B. The mitochondrial genomes of two scallops, *Argopecten irradians* and *Chlamys farreri* (Mollusca: Bivalvia): the most highly rearranged gene order in the family Pectinidae. *Journal of Molecular Evolution*. 2009; 70: 57–68. <https://doi.org/10.1007/s00239-009-9308-4> PMID: [20013337](#)
80. Milbury CA, Gaffney PM. Complete mitochondrial DNA sequence of the eastern oyster *Crassostrea virginica*. *Marine Biotechnology*. 2005; 7: 697–712. <https://doi.org/10.1007/s10126-005-0004-0> PMID: [16132463](#)
81. Kumazawa Y, Miura S, Yamada C, Hashiguchi Y. Gene rearrangements in gekkonid mitochondrial genomes with shuffling, loss, and reassignment of tRNA genes. *BMC Genomics*. 2014; 15: 930. <https://doi.org/10.1186/1471-2164-15-930> PMID: [25344428](#)
82. Sahyoun AH, Hölzer M, Jühling F, Hölzer zu Siederdisen C, Al-Arab M, Tout K, et al. Towards a comprehensive picture of alloacceptor tRNA remolding in metazoan mitochondrial genomes. *Nucleic Acids Research*. 2015; 43: 8044–8056. <https://doi.org/10.1093/nar/gkv746> PMID: [26227972](#)
83. Boore JL, Brown WM. Big trees from little genomes: mitochondrial gene order as a phylogenetic tool. *Current Opinion in Genetics and Development*. 1998; 8: 668–674. PMID: [9914213](#)
84. Perseke M, Bernhard D, Fritsch G, Brümmer F, Stadler PF, Schlegel M. Mitochondrial genome evolution in Ophiuroidea, Echinoidea, and Holothuroidea: insights in phylogenetic relationships of Echinodermata. *Molecular Phylogenetic Evolution*. 2010; 56:201–211. <https://doi.org/10.1016/j.ympev.2010.01.035> PMID: [20152912](#)
85. Krylova EM, Sahling H. Recent bivalve molluscs of the genus *Calyptogena* (Vesicomyidae). *Journal of Molluscan Studies*. 2006; 72: 359–395. <https://doi.org/10.1093/mollus/eyl022>
86. Decker C, Olu K, Cunha RL, Arnaud-Haond S. Phylogeny and diversification patterns among vesicomyid bivalves. *PLoS ONE*. 2012; 7: e33359. <https://doi.org/10.1371/journal.pone.0033359> PMID: [22511920](#)

87. Johnson SB, Krylova EM, Audzijonyte A, Sahling H, Vrijenhoek RC. Phylogeny and origins of chemosynthetic vesicomyid clams. *Systematics and Biodiversity*. 2017; 15: 346–360. <https://doi.org/10.1080/14772000.2016.1252438>
88. Shen YY, Liang L, Zhu ZH, Zhou WP, Irwin DM, Zhang YP. Adaptive evolution of energy metabolism genes and the origin of flight in bats. *Proceedings of the National Academy of Sciences of the United States of America*. 2010; 107: 8666–8671. <https://doi.org/10.1073/pnas.0912613107> PMID: 20421465
89. Tomasco IH, Lessa EP. The evolution of mitochondrial genomes in subterranean caviomorph rodents: adaptation against a background of purifying selection. *Molecular Phylogenetics and Evolution*. 2011; 61: 64–70. <https://doi.org/10.1016/j.ympev.2011.06.014> PMID: 21723951
90. Plazzi F, Puccio G, Passamonti M. Burrowers from the past: mitochondrial signatures of Ordovician bivalve infaunalization. *Genome Biology and Evolution*. 2017; 9: 956–967. <https://doi.org/10.1093/gbe/evx051> PMID: 28338965
91. da Fonseca RR, Johnson WE, O'Brien SJ, Ramos MJ, Antunes A. The adaptive evolution of the mammalian mitochondrial genome. *BMC Genomics*. 2008; 9: 119. <https://doi.org/10.1186/1471-2164-9-119> PMID: 18318906
92. Yang YX, Xu SX, Xu JX, Guo Y, Yang G. Adaptive evolution of mitochondrial energy metabolism genes associated with increased energy demand in flying insects. *Plos ONE*. 2014; 9: e99120. <https://doi.org/10.1371/journal.pone.0099120> PMID: 24918926
93. Das J. The role of mitochondrial respiration in physiological and evolutionary adaptation. *BioEssays*. 2006; 28: 890–901. <https://doi.org/10.1002/bies.20463> PMID: 16937356
94. Zhang J, Nielsen R, Yang Z. Evaluation of an improved branch-site likelihood method for detecting positive selection at the molecular level. *Molecular Biology and Evolution*. 2005; 22: 2472–2479. <https://doi.org/10.1093/molbev/msi237> PMID: 16107592
95. Trumpower BL. The protonmotive Q cycle. Energy transduction by coupling of proton translocation to electron transfer by the cytochrome bc1 complex. *Journal of Biological Chemistry*. 1990; 265:11409–11412. PMID: 2164001
96. Silva G, Lima FP, Martel P, Caastilho R. Thermal adaptation and clinal mitochondrial DNA variation of European anchovy. *Proceedings Biological Sciences*. 2014; 281: 1792. <https://doi.org/10.1098/rspb.2014.1093> PMID: 25143035
97. Luo YJ, Gao WX, Gao YQ, Tang S, Huang QY, Tan XL, et al. Mitochondrial genome analysis of *Ochotona curzoniae* and implication of cytochrome c oxidase in hypoxic adaptation. *Mitochondrion*. 2008; 8: 352–357. <https://doi.org/10.1016/j.mito.2008.07.005> PMID: 18722554
98. Mahalingam S, McClelland GB, Scott GR. Evolved changes in the intracellular distribution and physiology of muscle mitochondria in high-altitude native deer mice. *The Journal of Physiology*. 2017; 595: 4785–4801. <https://doi.org/10.1113/JP274130> PMID: 28418073
99. Chandel NS, Maltepe E, Goldwasser E, Mathieu CE, Simon MC, Schumacker PT. Mitochondrial reactive oxygen species trigger hypoxia-induced transcription. *Proceedings of the National Academy of Sciences of the United States of America*. 1998; 95: 11715–11720. <https://doi.org/10.1073/pnas.95.20.11715> PMID: 9751731
100. Dirmeier R, O'Brien KM, Engle M, Dodd A, Spears E, Poyton RO. Exposure of yeast cells to anoxia induces transient oxidative stress. Implications for the induction of hypoxic genes. *Journal of Biological Chemistry*. 2002; 277: 34773–34784. <https://doi.org/10.1074/jbc.M203902200> PMID: 12089150
101. Levin LA. Ecology of cold seep sediments: interactions of fauna with flow, chemistry and microbes. *Oceanography and Marine Biology*. 2005; 43:1–46.
102. Mu WD, Liu J, Zhang HB. Complete mitochondrial genome of *Benthodytes marianensis* (Holothuroidea: Elapodida: Psychropodidae): Insight into deep sea adaptation in the sea cucumber. *PLoS ONE*. 2018; 13: e0208051. <https://doi.org/10.1371/journal.pone.0208051> PMID: 30500836
103. Mu WD, Liu J, Zhang HB. The first complete mitochondrial genome of the Mariana Trench *Freyastera benthophila* (Asteroidea: Brisingida: Brisingidae) allows insights into the deep-sea adaptive evolution of Brisingida. *Ecology and Evolution*. 2018; 8: 10673–10686. <https://doi.org/10.1002/ece3.4427> PMID: 30519397
